# Supplementary material for: Low-ammonia niche of ammonia-oxidizing archaea in rotating biological contactors of a municipal wastewater treatment plant
Source: PubMed Central journal article supplement (PMC3466407; doi:10.1111/j.1462-2920.2012.02786.x), 2012-09

Supporting Information for manuscript:

**Low-ammonia niche of ammonia-oxidizing archaea in rotating biological contactors of a municipal wastewater treatment plant**

Laura A. Sauder<sup>1</sup>, Francien Peterse<sup>2</sup>, Stefan Schouten<sup>2</sup>, Josh D. Neufeld<sup>1\*</sup>

<sup>1</sup> Department of Biology, University of Waterloo, Waterloo, Ontario, Canada

<sup>2</sup> Department of Marine Organic Biogeochemistry, NIOZ Royal Netherlands Institute for Sea Research, Texel, Netherlands

<sup>†</sup> Current address: ETH Zürich, Geological Institute, Zürich, Switzerland

**Table S1.** Water chemistry data for RBC-associated wastewater.

| Sample | pH  | temp. (°C) | DOC (mg L <sup>-1</sup> ) | nitrate (mg L <sup>-1</sup> ) | nitrite (µg L <sup>-1</sup> ) | ammonium (µg L <sup>-1</sup> ) | dO <sub>2</sub> (mg L <sup>-1</sup> ) |
|--------|-----|------------|---------------------------|-------------------------------|-------------------------------|--------------------------------|---------------------------------------|
| FNER1  | 7.2 | 13.1       | NA                        | 29.4                          | 375.8                         | 401.9                          | 7.1                                   |
| FNER2  | 7.3 | 12.2       | NA                        | 22.5                          | 294.6                         | 320.3                          | 8.0                                   |
| FNER3  | 7.4 | 12.1       | NA                        | 28.1                          | 245.9                         | 260.9                          | 8.3                                   |
| FNER4  | 7.4 | 12.6       | NA                        | 28.4                          | 186.4                         | 223.8                          | 7.8                                   |
| FNER5  | 7.5 | 12.1       | NA                        | 28.9                          | 148.5                         | 147.5                          | 8.9                                   |
| FNER6  | 7.4 | 11.9       | NA                        | 28.2                          | 170.1                         | 210.6                          | 8.7                                   |
| FNER7  | 7.5 | 12.5       | NA                        | 29.0                          | 148.5                         | 159.3                          | 8.5                                   |
| FNER8  | 7.5 | 12.2       | NA                        | 28.5                          | 102.5                         | 106.8                          | 8.7                                   |
| JNER1  | 7.4 | 18.4       | 10.4                      | 21.2                          | 327.3                         | 252.9                          | 5.9                                   |
| JNER2  | 7.4 | 18.2       | 10.1                      | 21.5                          | 190.4                         | 135.0                          | 6.9                                   |
| JNER3  | 7.4 | 18.1       | 10.2                      | 21.7                          | 155.4                         | 128.1                          | 7.3                                   |
| JNER4  | 7.5 | 17.9       | 10.6                      | 21.1                          | 111.1                         | 112.0                          | 7.6                                   |
| JNER5  | 7.5 | 17.9       | 10.3                      | 21.5                          | 116.8                         | 89.7                           | 7.7                                   |
| JNER6  | 7.5 | 18.0       | 10.6                      | 21.7                          | 103.3                         | 81.5                           | 7.4                                   |
| JNER7  | 7.5 | 18.0       | 10.6                      | 21.4                          | 100.2                         | 79.3                           | 7.5                                   |
| JNER8  | 7.6 | 18.0       | 10.6                      | 22.0                          | 63.6                          | 45.5                           | 7.8                                   |
| JSER1  | 7.4 | 18.0       | 11.2                      | 20.9                          | 220.4                         | 147.4                          | 5.5                                   |
| JSER2  | 7.4 | 17.9       | 10.3                      | 20.9                          | 152.3                         | 103.9                          | 6.7                                   |
| JSER3  | 7.4 | 18.0       | 10.6                      | 20.9                          | 159.3                         | 105.2                          | 6.5                                   |
| JSER4  | 7.4 | 18.0       | 9.5                       | 21.5                          | 144.6                         | 95.2                           | 6.8                                   |
| JSER5  | 7.4 | 18.0       | 10                        | 20.6                          | 115.7                         | 83.3                           | 7.1                                   |
| JSER6  | 7.5 | 17.9       | 10.3                      | 21.1                          | 107.6                         | 78.4                           | 7.2                                   |
| JSER7  | 7.5 | 18.0       | 9.8                       | 21.4                          | 84.6                          | 74.2                           | 7.3                                   |
| JSER8  | 7.6 | 18.0       | 10.3                      | 20.6                          | 72.8                          | 52.3                           | 7.5                                   |
| SNER1  | 7.3 | 21.0       | 9.3                       | 12.9                          | 91.7                          | 176.6                          | 6.0                                   |
| SNER2  | 7.4 | 21.1       | 10.3                      | 13.1                          | 66.5                          | 152.6                          | 6.1                                   |
| SNER3  | 7.3 | 21.0       | 10.7                      | 14.8                          | 56.8                          | 148.7                          | 6.4                                   |
| SNER4  | 7.3 | 21.0       | 10.0                      | 20.6                          | 65.7                          | 110.2                          | 6.6                                   |
| SNER5  | 7.4 | 20.9       | 10.0                      | 15.0                          | 51.9                          | 95.4                           | 6.8                                   |
| SNER6  | 7.4 | 20.9       | 10.7                      | 17.5                          | 46.8                          | 81.6                           | 6.9                                   |
| SNER7  | 7.3 | 21.0       | 10.6                      | 15.8                          | 27.6                          | 43.1                           | 7.0                                   |
| SNER8  | 7.5 | 21.0       | 10.2                      | 22.7                          | 38.4                          | 41.2                           | 7.1                                   |
| SSER1  | 7.3 | 21.0       | 9.6                       | 15.1                          | 51.4                          | 64.5                           | 5.9                                   |
| SSER2  | 7.3 | 21.1       | 9.3                       | 15.7                          | 39.7                          | 56.6                           | 6.5                                   |
| SSER3  | 7.5 | 21.0       | 9.0                       | 15.2                          | 35.1                          | 53.2                           | 6.6                                   |
| SSER4  | 7.2 | 21.1       | 8.8                       | 22.5                          | 43.5                          | 51.9                           | 6.6                                   |
| SSER5  | 7.4 | 21.0       | 9.1                       | 11.9                          | 27.0                          | 51.1                           | 6.7                                   |
| SSER6  | 7.4 | 21.0       | 9.1                       | 17.9                          | 28.9                          | 42.9                           | 6.9                                   |
| SSER7  | 7.3 | 21.0       | 9.1                       | 19.2                          | 43.0                          | 33.8                           | 7.1                                   |
| SSER8  | 7.3 | 21.0       | 9.1                       | 15.8                          | 21.9                          | 32.8                           | 7.0                                   |

DOC: dissolved organic carbon

dO<sub>2</sub>: dissolved oxygen

NA: data not available

Figure S1. Bacterial *amoA* (A) and general bacterial 16S rRNA (B) gene copies in biofilm samples across RBC flowpaths. Error bars represent standard deviations based on technical duplicates; error bars that are not seen are contained within the symbols.

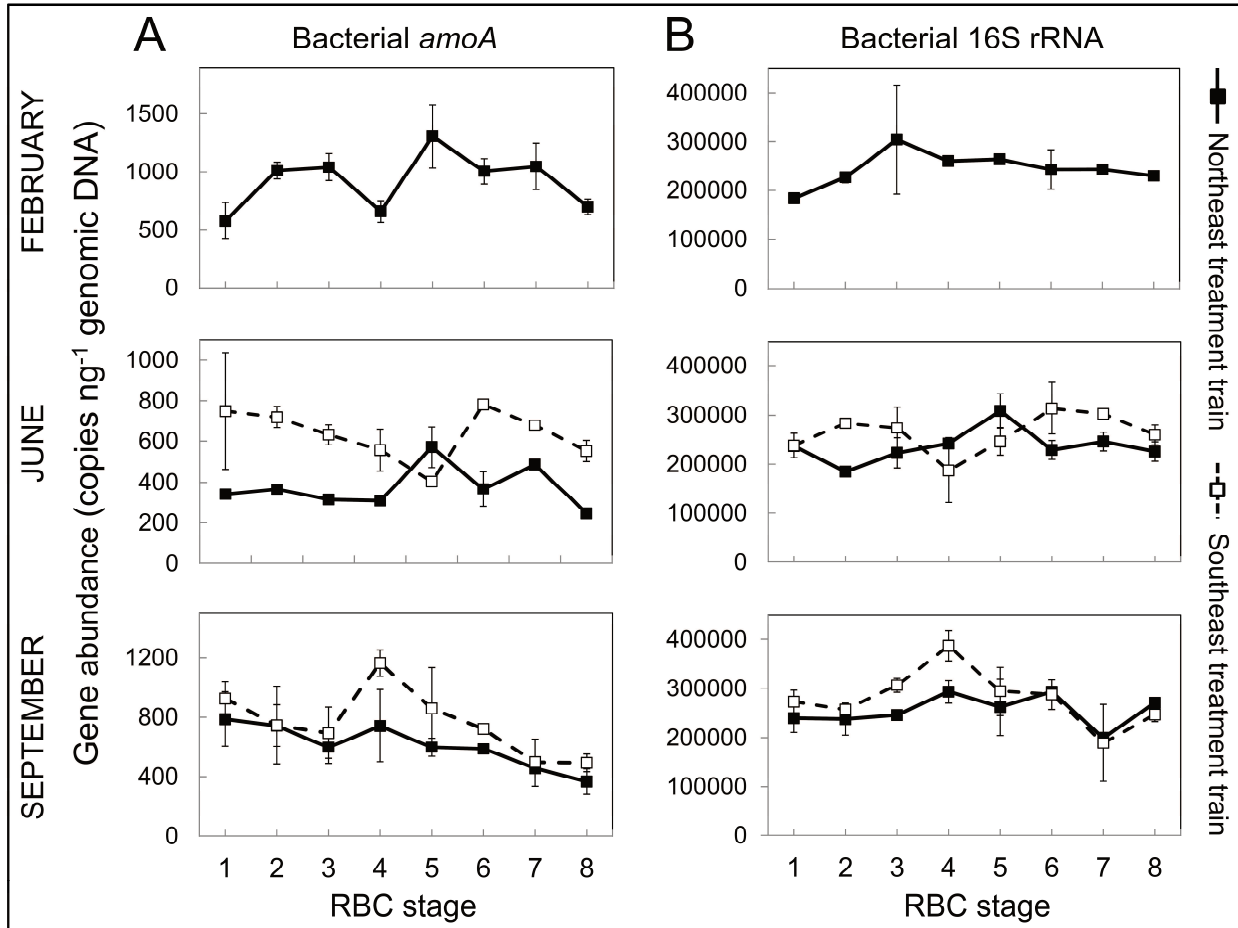

Figure S2. DGGE fingerprints for bacterial and thaumarchaeal *amoA* and 16S rRNA genes across eight serial RBC stages for all sampling seasons and RBC treatment trains.

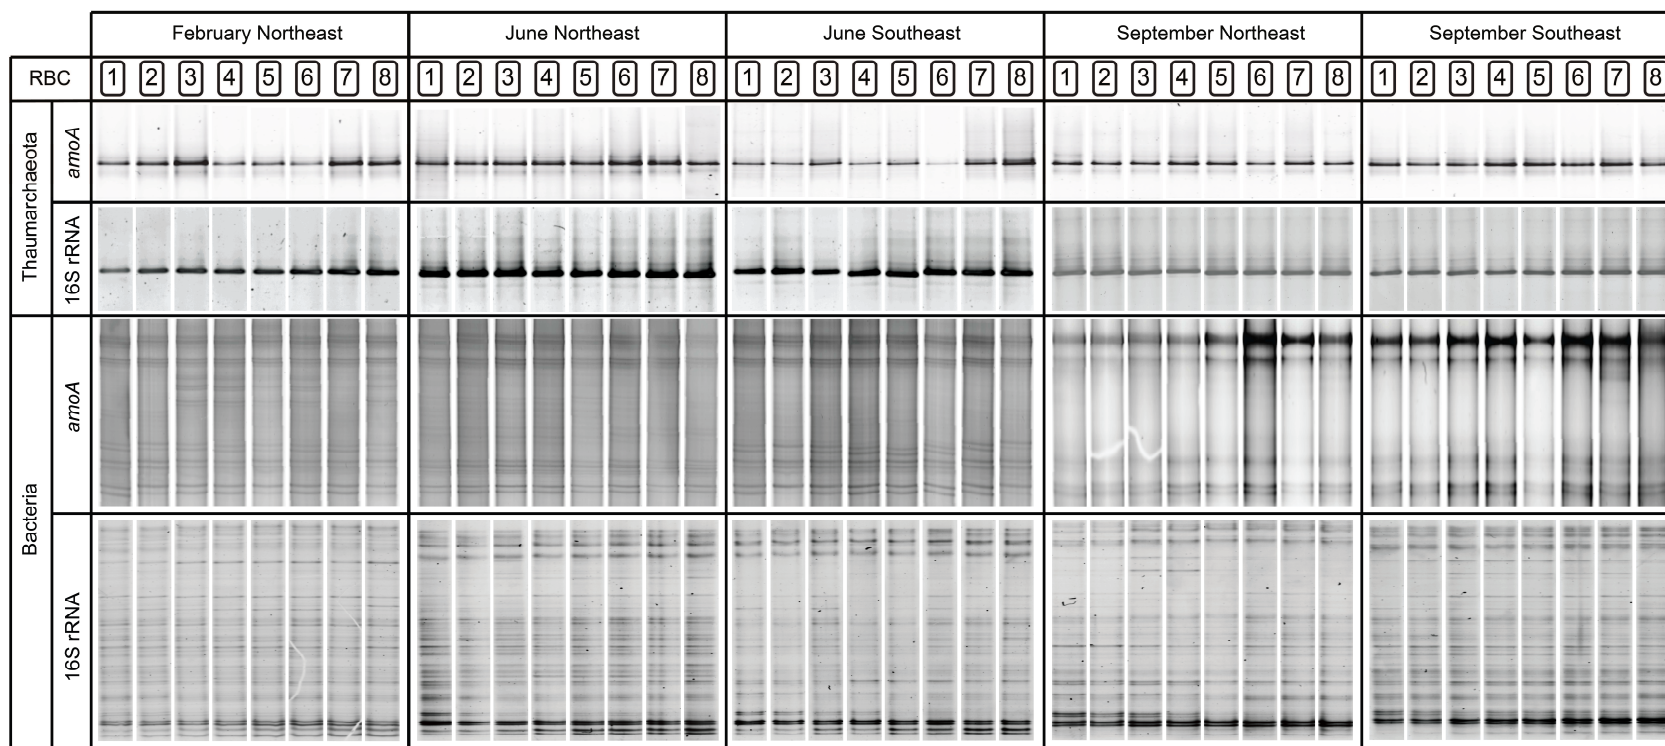

Supplement: emi0014-2589-SD1.pdf [file emi0014-2589-SD1.pdf]
